# Supplementary material
Source: PubMed Central journal article supplement (PMC7360963)

**Figure 6A**

**COX1**

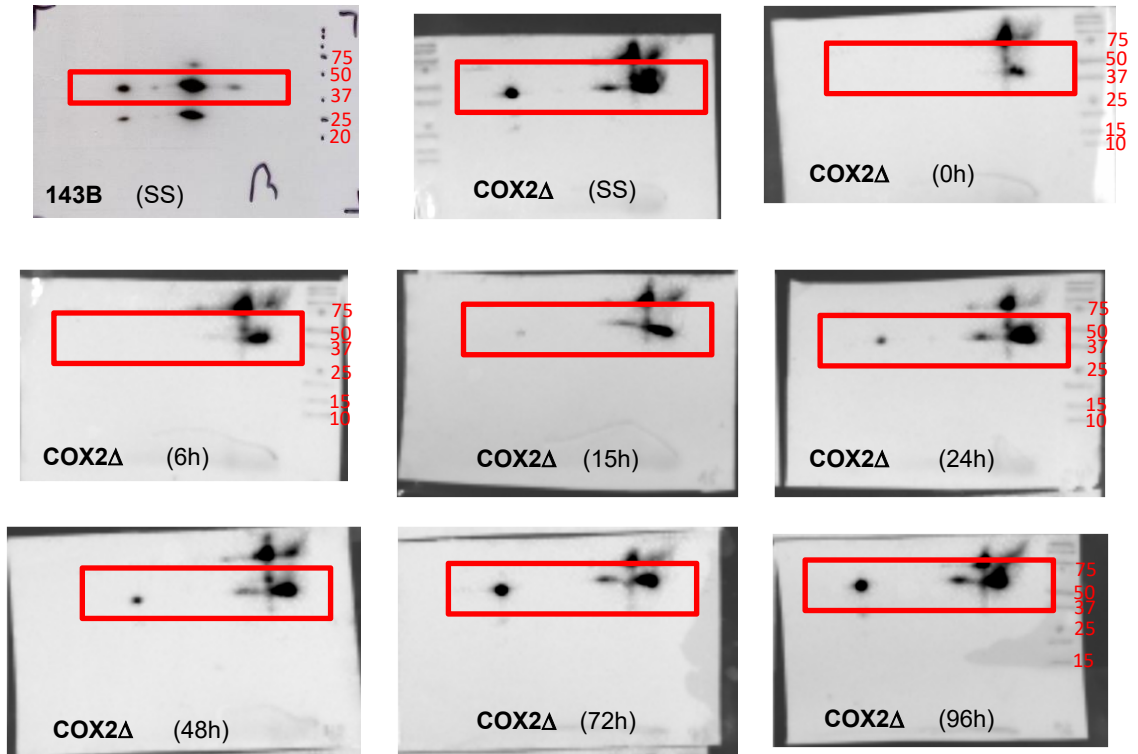

**COX5B**

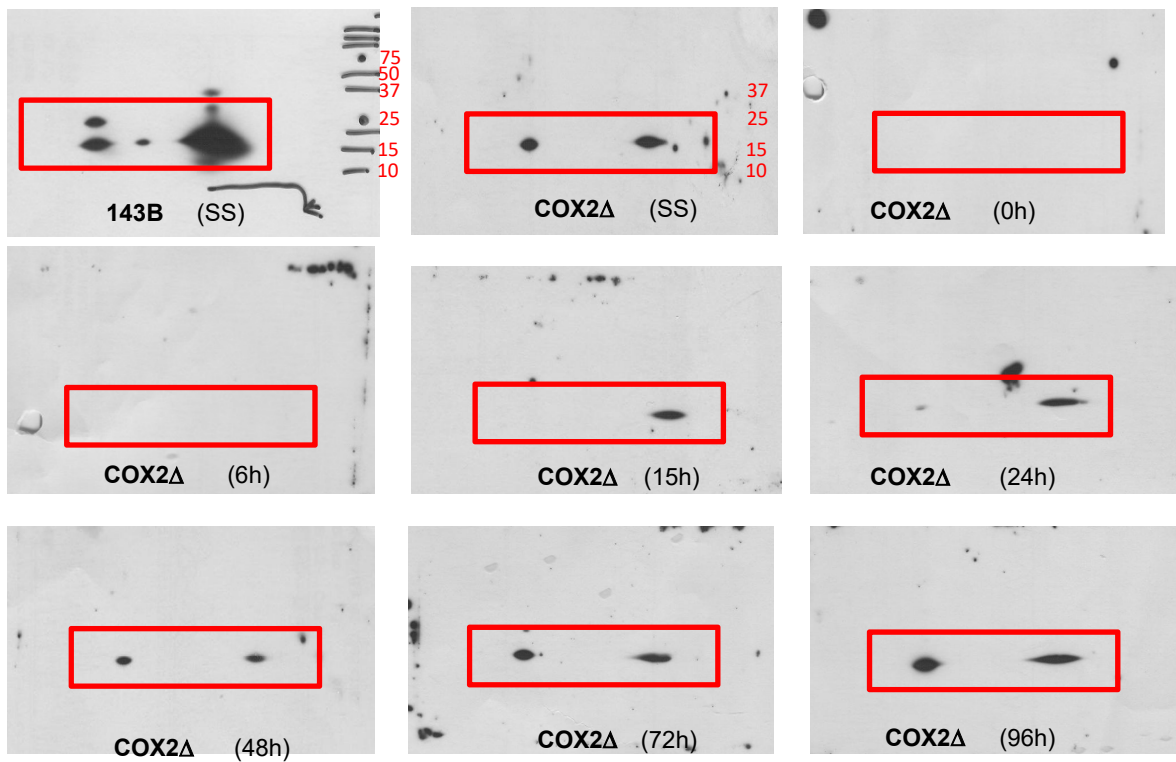

**Figure 6A**

**COX4**

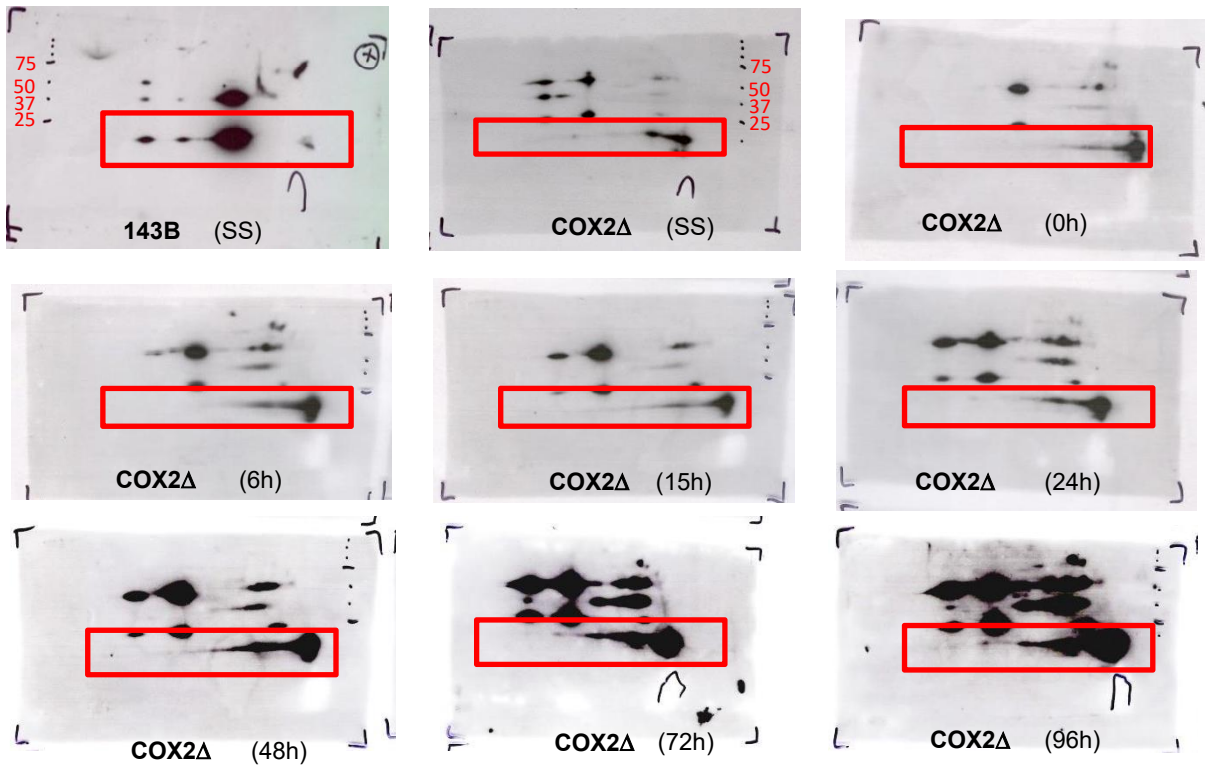

**COX5A**

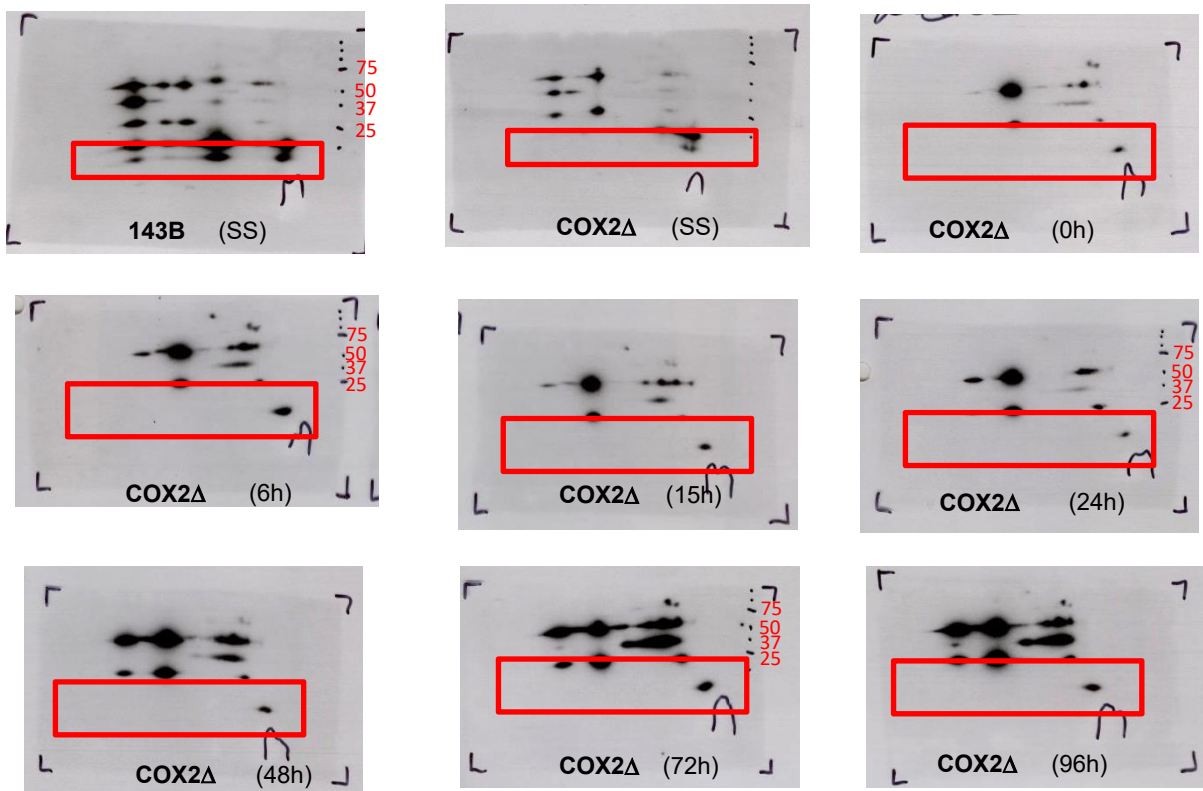

# Figure 6A

## COX6C

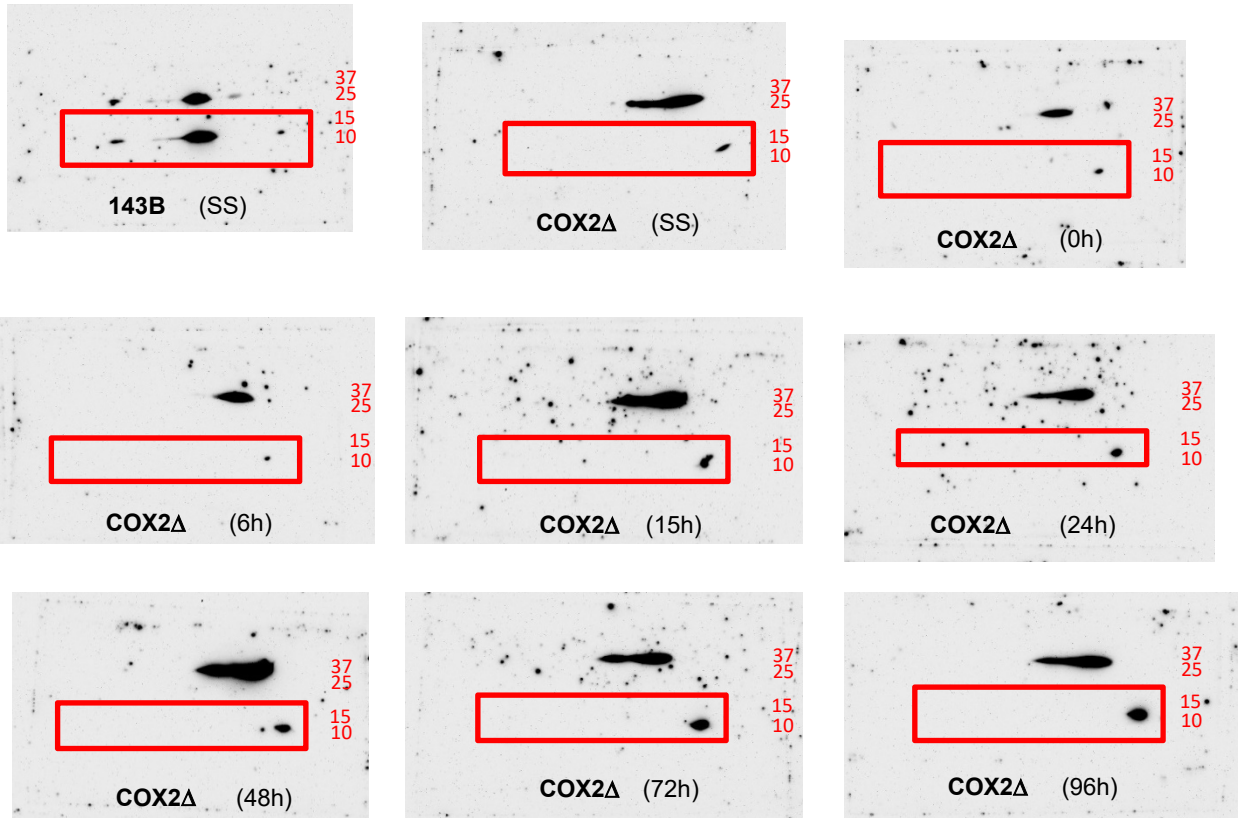

**Figure 6C**

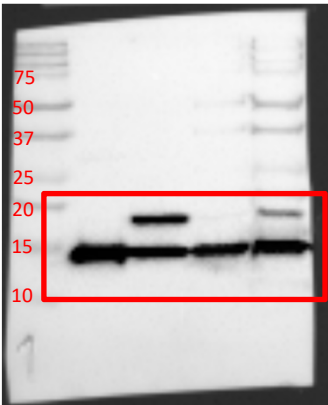

**COX5B**

**Figure 6D**

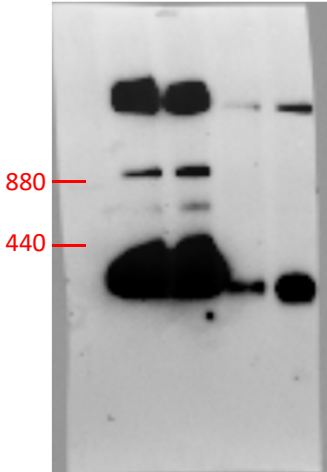

**COX5B**

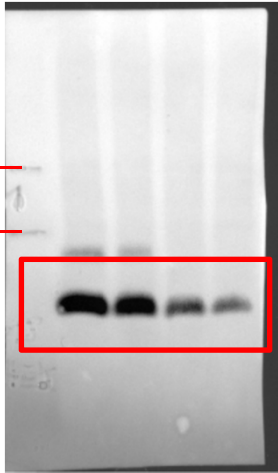

**SDHA**

Supplement: EMBJ-39-e103912-s005.pdf [file EMBJ-39-e103912-s005.pdf]

143B

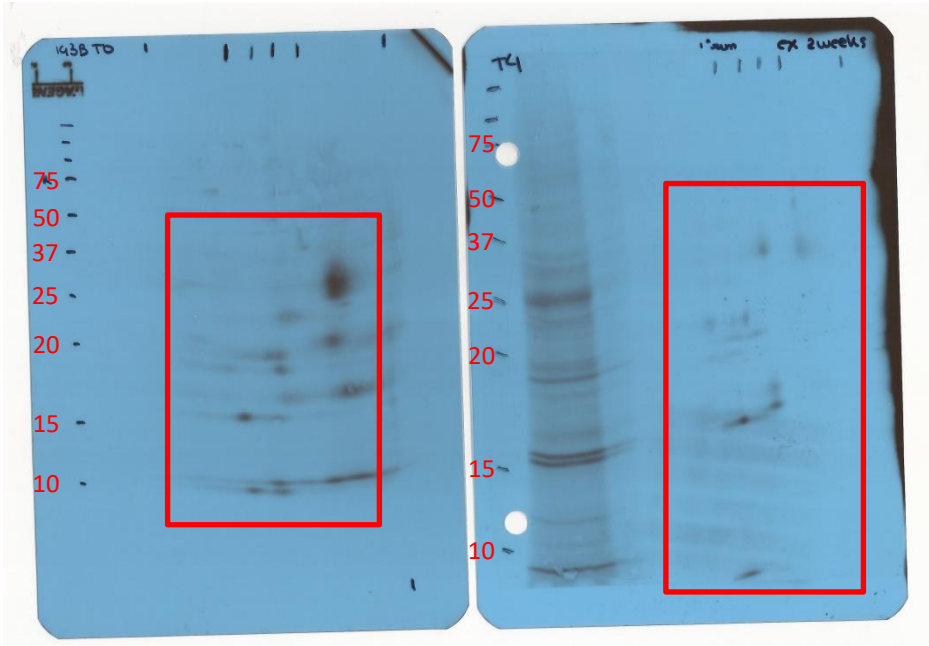

T0

T4

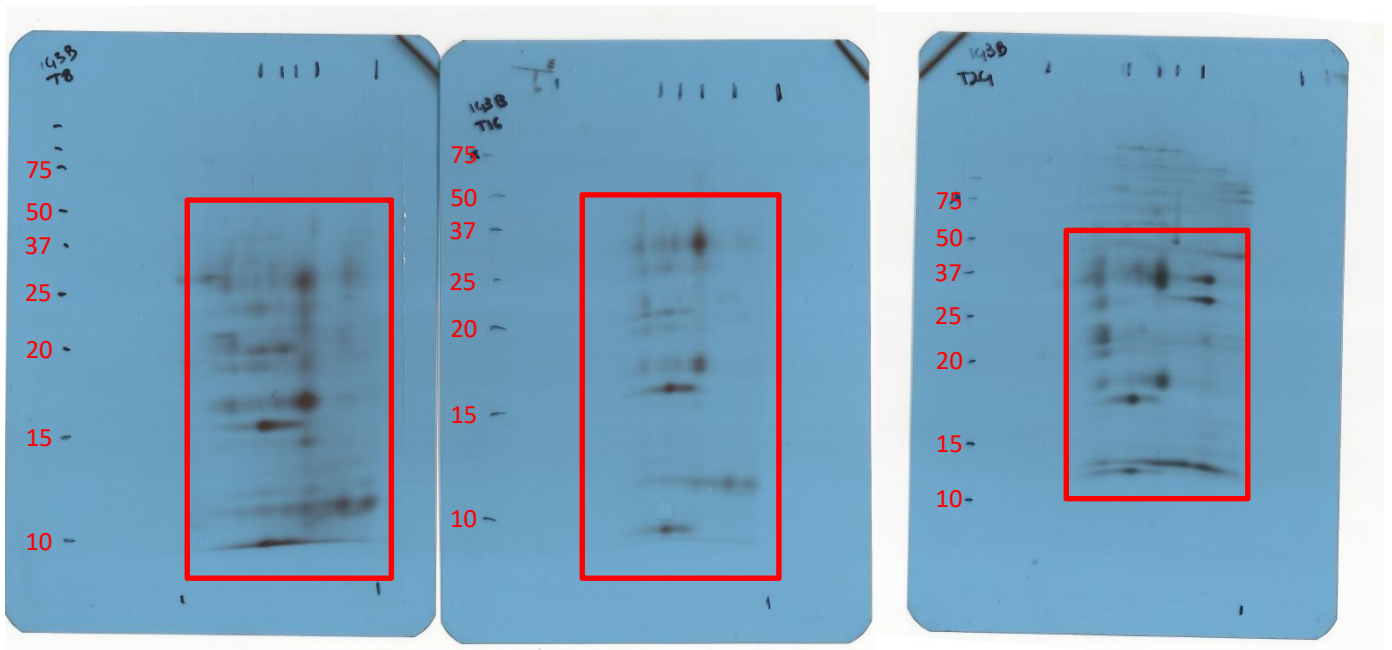

T8

T16

T24

# COX1Δ

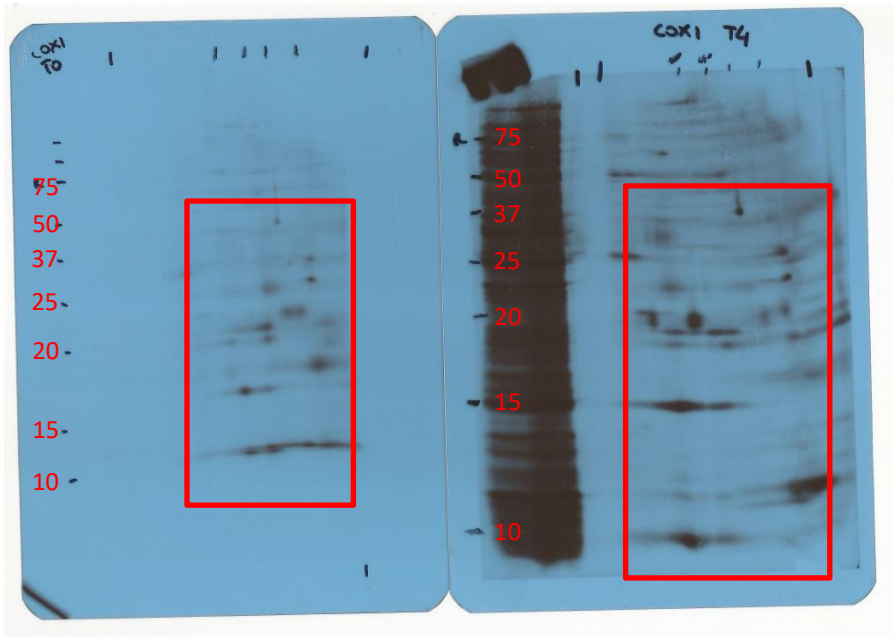

T0

T4

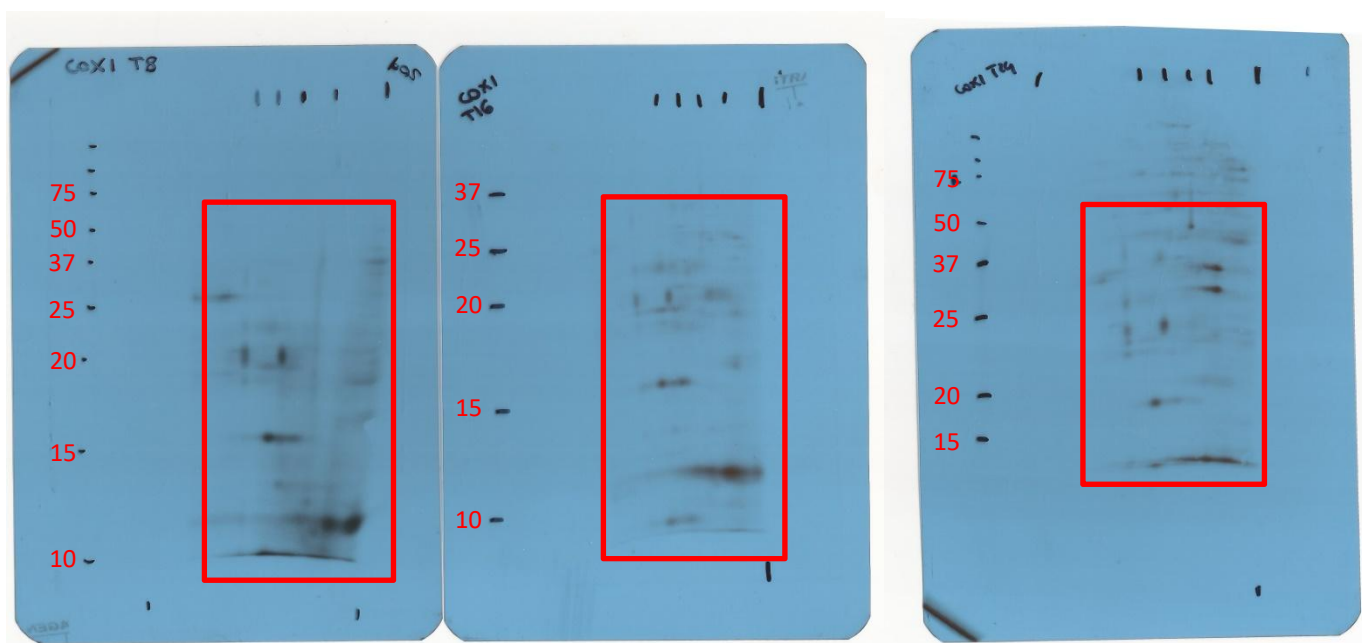

T8

T16

T24

# COX2Δ

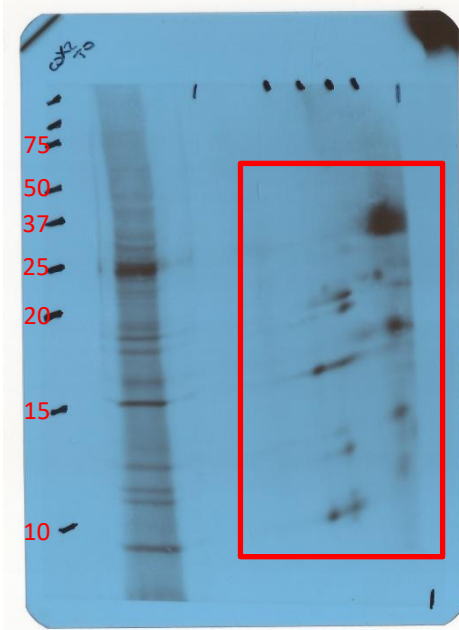

T0

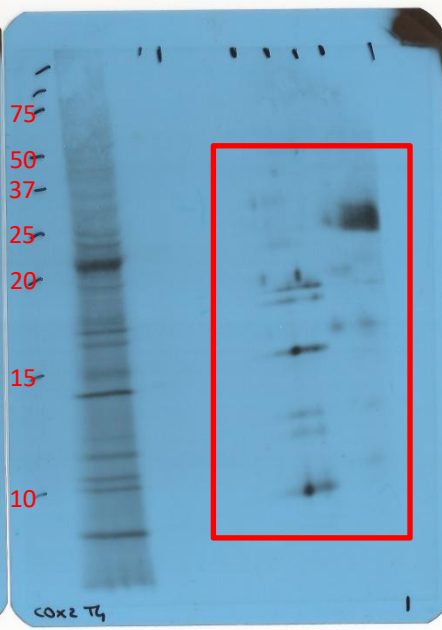

T4

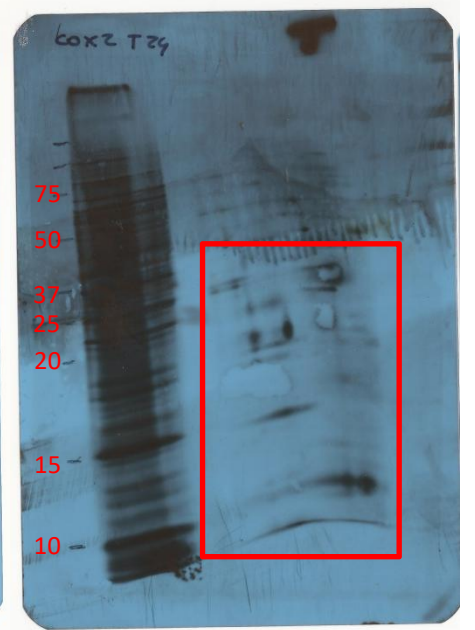

Short exposure

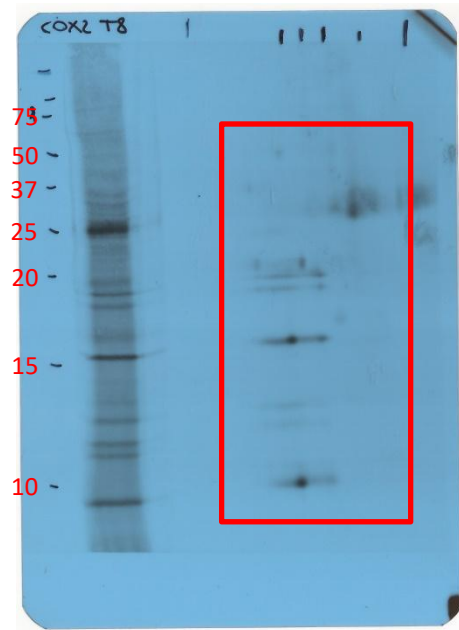

T8

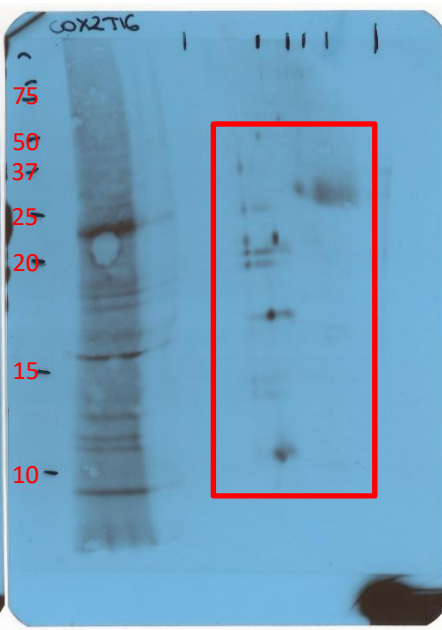

T16

↕  
T24  
(same gel)

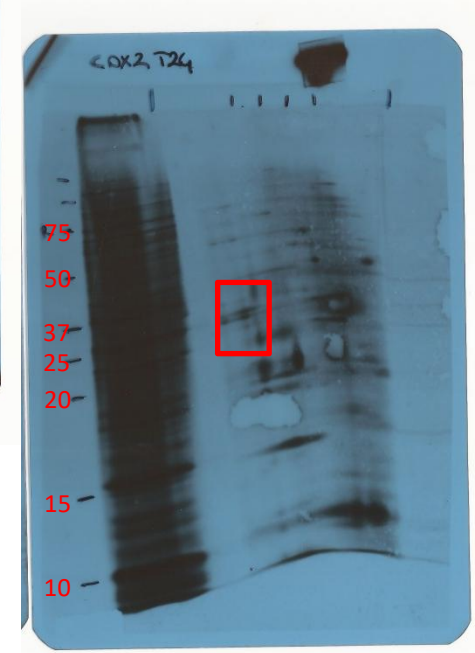

Long exposure

Supplement: EMBJ-39-e103912-s006.pdf [file EMBJ-39-e103912-s006.pdf]
